# Supplementary material for: Protective efficacy of a SARS-CoV-2 DNA vaccine in wild-type and immunosuppressed Syrian hamsters
Source: PubMed Central journal article supplement (PMC7835356; doi:10.1038/s41541-020-00279-z), 2021-01-25
Supplement: 41541_2020_279_MOESM1_ESM.pdf [file 41541_2020_279_MOESM1_ESM.pdf]

## Supplementary Figure 1

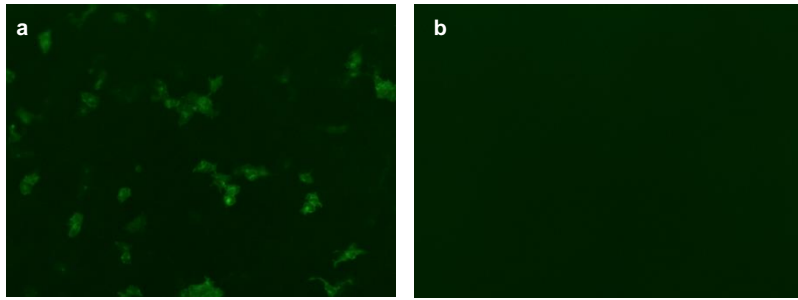

**Supplementary Figure 1. Expression of pWRG/nCoV-S(opt) plasmid in 293T cells.** Expression of the spike protein was confirmed by transfection of 293T cells followed by immunofluorescence antibody test (IFAT) using **a)** human convalescent plasma and compared to **b)** empty vector.

## Supplementary Figure 2

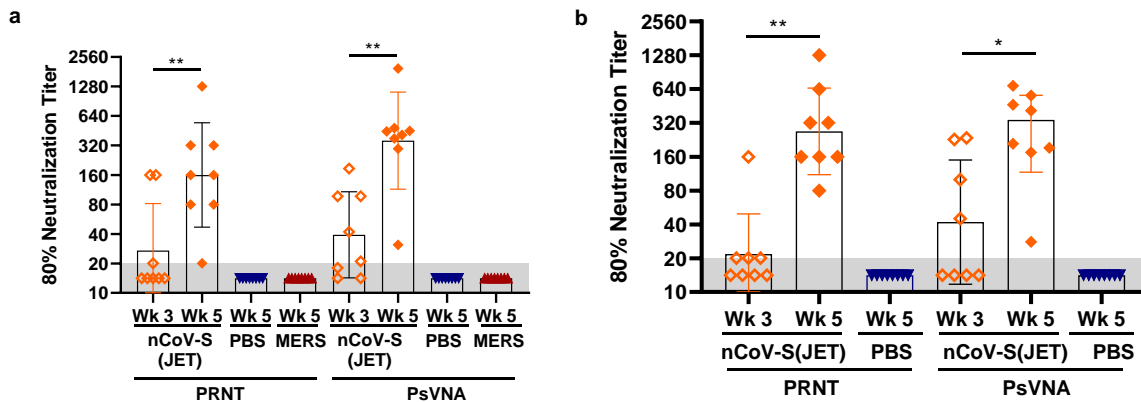

**Supplementary Figure 2. Neutralization titers of hamsters vaccinated with nCoV-S(JET) DNA vaccine.** Eighty percent neutralization titers by PRNT and PsVNA of hamsters shown in **Figs. 1b** and **2b** are plotted.

### Supplementary Figure 3

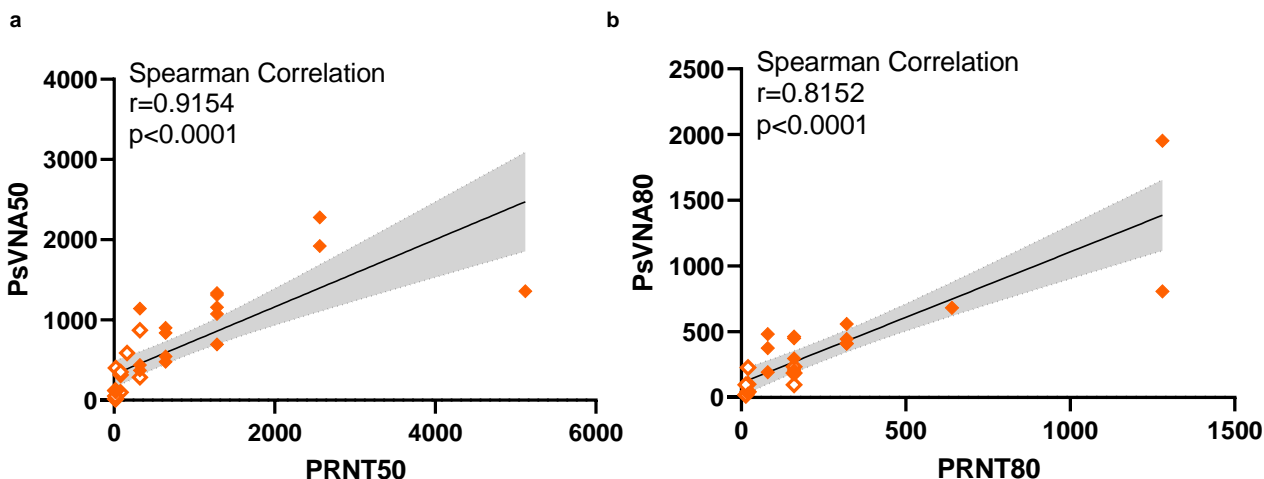

**Supplementary Figure 3. Correlation of PRNT and PsVNA assays.** a) Fifty and b) 80 percent neutralization titers by PRNT and PsVNA from hamsters vaccinated once (open symbols) or twice (closed symbols) with the nCoV-S(JET) vaccine from **Fig. 1** and **Fig. 2** are plotted (positive by at least one assay only). Correlation was analyzed by Spearman with an **a)**  $r=0.9154$  and  $P<0.0001$  and **b)**  $r=0.8152$  and  $P<0.0001$  with linear regression (black line) and 95% confidence intervals (shaded area) shown.

### Supplementary Figure 4

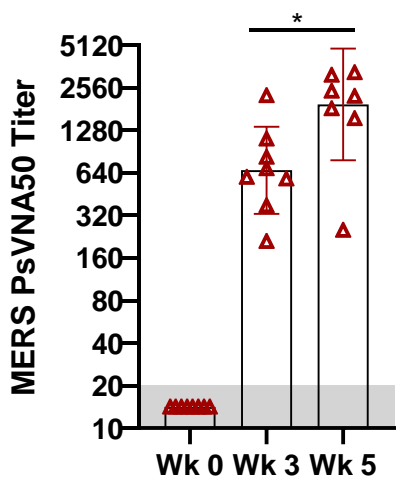

**Supplementary Figure 4. Neutralization titers of hamsters vaccinated with MERS-CoV DNA vaccine.** Eight hamsters were vaccinated with MERS-CoV DNA vaccine using Tropis. Serum collected prior to and after 1 and 2 vaccinations was analyzed by MERS PsVNA (LLOQ = 20, grey shade). Asterisks indicate that results were statistically significant, as follows: \*,  $P<0.05$ .

## Supplementary Figure 5

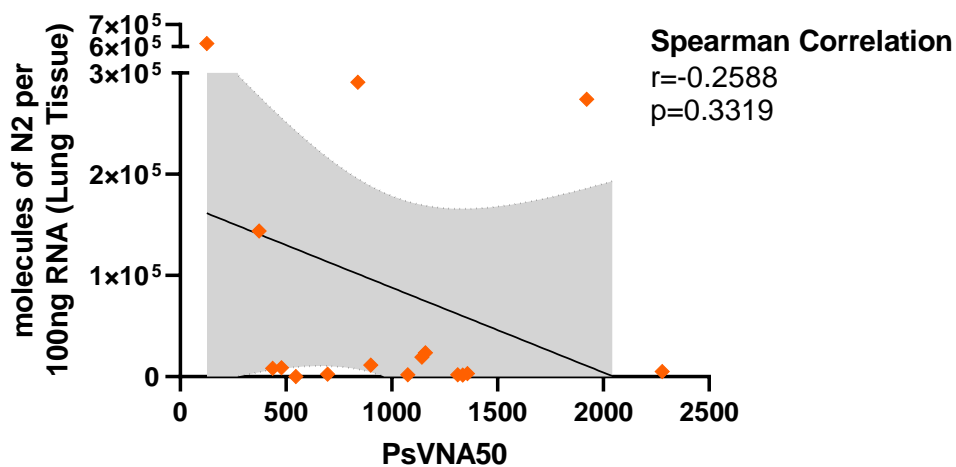

**Supplementary Figure 5. Correlation of PsVNA50 titers and lung viral RNA.** Fifty percent neutralization titers by PsVNA from hamsters vaccinated twice with nCoV-S(JET) vaccine are plotted against viral RNA detected in lung homogenates at the time of euthanasia (both **Fig. 1** and **Fig. 2**). Correlation was analyzed by Spearman with an  $r=-0.2588$  and  $P=0.3319$  with linear regression (black line) and 95% confidence intervals (shaded area) shown.
